# 1 **Research Article: A framework for disentangling ecological** 2 **mechanisms underlying the island species-area relationship**

3

4 Jonathan M. Chase<sup>1,2,\*</sup>, Leana Gooriah<sup>1</sup>, Felix May<sup>1,3</sup>, Wade A. Ryberg<sup>4</sup>, Matthew S. Schuler<sup>5</sup>,  
5 Dylan Craven<sup>6,1,7</sup>, Tiffany M. Knight<sup>6,8,1</sup>

6

7 <sup>1</sup>German Centre for Integrative Biodiversity Research (iDiv) Halle-Jena-Leipzig. Deutscher Platz  
8 5e, Leipzig, 04103, Germany

9 <sup>2</sup>Department of Computer Science, Martin Luther University, 06099, Halle, Germany

10 <sup>3</sup>Leuphana University Lüneburg, Universitätsallee 1, D-21335 Lüneburg, Germany

11 <sup>4</sup>Texas A&M Natural Resources Institute, College Station, Texas, USA

12 <sup>5</sup>Department of Biological Sciences, Darrin Fresh Water Institute, Rensselaer Polytechnic  
13 Institute, Troy, NY 12180, USA

14 <sup>6</sup>Department of Community Ecology, Helmholtz Centre for Environmental Research - UFZ,  
15 Halle (Saale), Germany

16 <sup>7</sup>Biodiversity, Macroecology & Biogeography, Faculty of Forest Sciences and Forest Ecology,  
17 University of Göttingen, Göttingen, Germany

18 <sup>8</sup>Institute of Biology, Martin Luther University Halle-Wittenberg, Halle (Saale), Germany

19

20 \*Corresponding author: jonathan.chase@idiv.de

21 URL: [https://www.idiv.de/groups\\_and\\_people/employees/details/eshow/chase\\_jonathan.html](https://www.idiv.de/groups_and_people/employees/details/eshow/chase_jonathan.html)

22

23

24 **Running title:** *Disentangling the island species-area relationship*

25

26 **Key Words:** *Area per se; Alpha-diversity; Beta-diversity; Biodiversity; Gamma-Diversity;*  
27 *Heterogeneity; Fragmentation; Island; Sampling Effects, Scale; Species-Area-Relationship;*  
28 *Individual-Based Rarefaction.*

29

30 **Abstract:**

31 The relationship between an island's size and the number of species on that island—the island  
32 species-area relationship (ISAR)—is one of the most well-known patterns in biogeography, and  
33 forms the basis for understanding biodiversity loss in response to habitat loss and fragmentation.  
34 Nevertheless, there is contention about exactly how to estimate the ISAR, and the influence of  
35 the three primary ecological mechanisms—random sampling, disproportionate effects, and  
36 heterogeneity—that drive it. Key to this contention is that estimates of the ISAR are often  
37 confounded by sampling and estimates of measures (i.e., island-level species richness) that are  
38 not diagnostic of potential mechanisms. Here, we advocate a sampling-explicit approach for  
39 disentangling the possible ecological mechanisms underlying the ISAR using parameters derived  
40 from individual-based rarefaction curves estimated across spatial scales. If the parameters  
41 derived from rarefaction curves at each spatial scale show no relationship with island area, we  
42 cannot reject the hypothesis that ISARs result only from random sampling. However, if the  
43 derived metrics change with island area, we can reject random sampling as the only operating  
44 mechanism, and infer that effects beyond sampling (i.e., disproportionate effects and/or  
45 heterogeneity) are also operating. Finally, if parameters indicative of within-island spatial  
46 variation in species composition (i.e.,  $\beta$ -diversity) increase with island area, we can conclude that  
47 intra-island compositional heterogeneity plays a role in driving the ISAR. We illustrate this  
48 approach using representative case studies, including oceanic islands, natural island-like patches,  
49 and habitat fragments from formerly continuous habitat, illustrating several combinations of  
50 underlying mechanisms. This approach will offer insight into the role of sampling and other  
51 processes that underpin the ISAR, providing a more complete understanding of how, and some  
52 indication of why, patterns of biodiversity respond to gradients in island area.

53

54 **Introduction:**

55 The relationship between the area sampled and the number of species in that area—the species-  
56 area relationship—is one of the oldest laws in ecology (e.g., Arrhenius 1921, Lawton 1999,  
57 Lomolino 2000, Drakare et al. 2006). There are many forms of SARs that represent rather  
58 distinct patterns and processes (e.g., Scheiner 2003, Scheiner et al. 2011), but we here focus  
59 specifically on one type, the Island Species-Area Relationship (hereafter ISAR). The ISAR  
60 correlates how the numbers of species (species richness) varies with the size of islands or distinct  
61 habitat patches (natural or fragmented due to human activities). Like other types of SARs, the  
62 ISAR is usually positive (e.g., MacArthur and Wilson 1963, 1967, Connor and McCoy 1979,  
63 Triantis et al. 2012). However, complexities such as island age, habitat heterogeneity and/or  
64 isolation can complicate this simple expectation (Kreft et al. 2008, Borregard et al. 2016).

65 We refer to 'islands' in the ISAR as any insular system, including true islands, habitat patches  
66 that are surrounded by distinctly different habitats (matrix) (e.g., lakes, edaphically delimited  
67 habitats), and habitat fragments that have been insularized by human activities. In addition to  
68 being an important biogeographic pattern in its own right, the ISAR and concepts closely related  
69 to it play an important role in understanding how biodiversity changes when habitat is lost and/or

70 fragmented into smaller island-like habitats (e.g., Diamond 1975, Simberloff and Abele 1976,  
71 Matthews et al. 2014, 2016, Fahrig 2017). As a result, understanding the patterns and the  
72 processes underlying ISARs and their derivatives would seem to be an important endeavor in the  
73 context of island biogeography and conservation.

74 Despite its conceptual importance, there remains a great deal of ambiguity regarding ISAR  
75 patterns, as well as its underlying processes (e.g., Scheiner et al. 2011). When describing ISAR  
76 patterns, authors report and analyze different aspects of species richness regressed against total  
77 island size, including total numbers of species and the number of species found within a  
78 constantly-sized sub-sampled area. Such different sampling designs have created confusion  
79 when comparing slopes of ISARs; an increasing number of species measured in a fixed-area plot  
80 with increasing island area means something quite different than an increasing number of species  
81 on the entire island (see also Hill et al. 1994, Gilaldi et al. 2011, 2014). In terms of processes  
82 underlying the ISAR, there is similar confusion. Multiple mechanisms, including passive  
83 sampling, colonization/extinction (i.e., metacommunity) dynamics, and habitat heterogeneity, as  
84 well as their interactions, have been invoked to explain ISARs. Unfortunately, the exact ways by  
85 which these mechanisms operate, and how they can be disentangled from observational data,  
86 remains in question.

87 Following others (e.g., Triantis et al. 2012, Mathews et al. 2014, 2016), we refer to the ISAR as  
88 the relationship between the total species richness on a given island (or habitat patch) and the  
89 size of that island. However, simply knowing the shape of the relationship between the size of  
90 an island and the total species richness (hereafter  $S_{total}$ ) on that island can tell us very little about  
91 the possible mechanisms underlying the ISAR. In order to understand the mechanisms  
92 underlying the ISAR, it is necessary to collect and analyze data at the level below the scale of the  
93 entire island (see also Hill et al. 1994, Yaacobi et al. 2007, Stiles and Scheiner 2010, Gilaldi et  
94 al. 2011, 2014). Specifically, we recommend collecting data from multiple standardized plots  
95 where both the numbers and relative abundances of species are available, as well as  
96 compositional differences of species among locations within an island. We recognize that this  
97 requires extra data often not available for many biogeographical and macroecological studies of  
98 island systems, but emphasize that the extra effort involved allows a much deeper understanding  
99 of the possible processes underlying the ISAR patterns observed.

## 100 **Mechanisms Underlying the ISAR**

101 We overview three general classes of potential mechanisms underlying the ISAR—passive  
102 sampling, disproportionate responses and heterogeneity—from least complex to most complex  
103 (see also Connor and McCoy 1979, McGuinness 1984, Scheiner et al. 2011 for deeper  
104 discussions of these mechanisms more generally for all types of SARs). Then we discuss how  
105 they can be detected using a multi-scale, multi-metric approach. Importantly, there remains  
106 much confusion in the literature regarding exactly which mechanisms can create the ISAR,  
107 which patterns these mechanisms generate, and how to disentangle them. Thus, we begin with a  
108 general overview of the general classes of mechanisms and discuss how they can be disentangled  
109 with a more directed sampling approach.

110 In brief, *passive sampling* (sometimes called the ‘more individuals hypothesis’) emerges when  
111 larger islands have more species than smaller islands via passive sampling of individuals (and  
112 thus species) from a larger regional pool. *Disproportionate response* (sometimes called ‘area  
113 per se’) include a large array of possible mechanisms that influence the likelihood that some  
114 species are favored, and others disfavored, on islands of different sizes, such that they achieve  
115 different relative abundances on different sized islands. *Heterogeneity* also leads to  
116 disproportionate responses and altered relative abundances of species, but these emerge at larger  
117 scales via clumping of species that can emerge because of habitat differences and/or dispersal  
118 limitation. In the following sections, we discuss each of these mechanisms, and possible ways to  
119 detect them from within-island surveys.

120 *Passive sampling*—The simplest mechanism of the ISAR is that islands passively sample  
121 individuals from a larger ‘regional’ pool of individuals of different species. Larger islands  
122 passively sample more individuals, and thus more species, from the regional pool. This is  
123 essentially a ‘null’ hypothesis, but one that can be tested using standard methods, and which  
124 provides important insights about the potential underlying processes leading the ISAR. The  
125 influence of passive sampling on the ISAR was first described by Arrhenius (1921) in one of the  
126 first quantitative explorations of the ISAR. It is important to emphasize that sampling effects are  
127 sometimes thought of as an artifact of limited sampling for uncovering the true numbers of  
128 species. This is not the case for this passive sampling null hypothesis. It is also implicit in  
129 several early quantitative explorations of the ISAR where the regional pool consists of few  
130 common and many rare species, and smaller islands passively sample fewer individuals, and thus  
131 fewer species than larger islands (i.e., Preston 1960, May 1975).

132 Coleman (1981) developed an analytical formula for this process based on random placement of  
133 individuals on islands and Coleman et al. (1982) applied it to data from samples of breeding  
134 birds on islands in a reservoir to suggest that this passive sampling mechanism most likely  
135 explained the ISAR in this system. This will create a positive ISAR with more rare species being  
136 present on larger islands, but only in proportion to their abundance in the total pool (i.e., the  
137 relative proportions of species does not change from small to large islands). Importantly, this  
138 random placement method is nearly identical to individual-based rarefaction methods (e.g.,  
139 Gotelli and Colwell 2001), which we use below to test the random sampling hypothesis.

140 Several authors have tested the passive sampling hypothesis by measuring the numbers of  
141 species in a given fixed area on islands of different sizes and correlating that density with the  
142 total area of the island (e.g., Hill et al. 1994, Kohn and Walsh 1994, Yaacobi et al. 2007, Gilaldi  
143 et al. 2011, 2014). If the number of species in a fixed area sample does not vary as island size  
144 varies, this is taken to imply that passive sampling is most likely the only mechanism acting.  
145 However, if the number of species in a fixed area increases as island size increases, we would  
146 instead conclude that there is some biological effect, beyond sampling, that allows more species  
147 to persist in a given area on larger than smaller islands.

148 While fixed-area sampling can be useful for inferring whether ISAR patterns deviate from  
149 patterns expected from pure sampling effects, this method is unfortunately not as powerful of a  
150 ‘null hypothesis’ as has often been suggested. There are at least two common factors that can

151 lead to patterns that appear consistent with the passive sampling hypothesis that in fact emerge  
152 from effects that are beyond sampling. First, when disproportionate effects are primarily  
153 experienced by rare species, sampling at small spatial grains may miss this effect, especially  
154 when averages of the numbers of species are taken from the smallest spatial scale. For example,  
155 Karger et al. (2014) found that fern species richness in standardized plots did not increase with  
156 island area when measured at small spatial grains (i.e., 400m<sup>2</sup>-2400m<sup>2</sup>), but that the slope  
157 significantly increasing at the largest sampling grain (6400 m<sup>2</sup>). Second, it is possible that  
158 species richness measured in standardized plots may not vary with island size, but that habitat  
159 heterogeneity leads to different species present in different habitat types, creating the ISAR. For  
160 example, Sfenthourakis and Panitsa (2012) found that plant species richness on Greek islands  
161 measured at local (100m<sup>2</sup>) scales did not change with island area, but that there were high levels  
162 of  $\beta$ -diversity on islands that were larger, likely due to increased heterogeneity. In both of these  
163 studies, simply measuring standardized species richness in small plots across islands of different  
164 spatial grains may have led to the faulty conclusion of random sampling effects.

165 ***Disproportionate effects***—When disproportionate effects underlie the ISAR, there are more  
166 species on larger islands because species from the regional pool are differentially influenced by  
167 island size (as opposed to the passive sampling hypothesis, where species are proportionately  
168 influenced by island size). Disproportionate effects includes a number of different sub-  
169 mechanisms whereby some species are favored, and others disfavored, by changes in island size.

170 Most such mechanisms predict that the numbers of species in a fixed sampling area should  
171 increase with increasing island size (sometimes called ‘area per se’ mechanisms; Connor and  
172 McCoy 1979). The mostly widely considered of these mechanisms is MacArthur and Wilson’s  
173 (1963, 1967) theory of island biogeography. Here, the rates of colonization of species increases  
174 with island size, and the rates of extinction decrease with island size, leading to the expectation  
175 that more species should often be able to persist in a fixed area on larger islands. Several other  
176 kinds of spatial models can also predict similar patterns whereby the coexistence of several  
177 species is favored when the total area increases (e.g., Hanski et al. 2013), or when population-  
178 level processes, such as Allee-effects or demographic stochasticity, are less likely on larger  
179 relative to smaller islands (e.g., Hanski and Gyllenberg 1993, Orrock and Wattleing 2010).  
180 Disproportionate effects can also emerge when changes in island size influences island-level  
181 environmental conditions. For example, smaller islands are often more likely to experience  
182 disturbances and/or have lower productivity (McGuinness 1984), and in the context of habitat  
183 fragmentation, smaller island fragments often have edge effects whereby habitat-specialist  
184 species are negatively impacted (Ewers and Didham 2006).

185 Although often less well appreciated, mechanisms similar to those described above can favor  
186 multiple species in smaller, rather than larger habitats. For example, it is possible that more  
187 widespread species can dominate larger habitats via high rates of dispersal and mass effects.  
188 Likewise, especially in the context of habitat islands formed via habitat fragmentation,  
189 disproportionate effects favoring species in smaller islands can include the disruption of  
190 exclusion interspecific interactors (e.g., pathogens, predators or competitors), or more species  
191 favored by edges and heterogeneity created in smaller habitats (Fahrig 2017). In such cases, we

192 might expect a weaker or even negative ISAR depending on whether random sampling effects  
193 (which are always operating) outweigh the disproportionate effects

194 **Heterogeneity**—The last family of mechanisms that have been proposed to lead to the ISAR  
195 involve heterogeneity in the composition of species within islands. These mechanisms are  
196 centered on the supposition that larger islands can have more opportunity for species to  
197 aggregate intraspecifically or clump (leading to heterogeneity in species composition) than  
198 smaller islands. This can emerge from two distinct sub-mechanisms:

199 (i) *Habitat heterogeneity*. Habitat heterogeneity leads to dissimilarities in species composition  
200 via the ‘species sorting’ process inherent to niche theory (e.g., Whittaker 1970, Tilman 1982,  
201 Chase and Leibold 2003). As a mechanism for the ISAR, larger islands are often assumed to  
202 have higher levels of habitat heterogeneity than smaller islands (e.g., Williams 1964, Hortal et al.  
203 2009). For example, larger oceanic islands typically have multiple habitat types, including  
204 mountains, valleys, rivers, etcetera, allowing for multiple types of species to specialize on these  
205 habitats, whereas smaller islands only have a few habitat types. Likewise, in freshwater lakes,  
206 which can be thought of as aquatic islands in a terrestrial ‘sea’, larger lakes typically have more  
207 habitat heterogeneity (e.g., depth zonation) than smaller lakes.

208 (ii) *Compositional heterogeneity due to dispersal limitation*. Dispersal limitation can also lead to  
209 compositional heterogeneity through a variety of spatial mechanisms, including ecological drift,  
210 colonization and competition tradeoffs, and the like (e.g., Condit et al. 2002, Leibold and Chase  
211 2017). If dispersal limitation is more likely on larger islands, we might expect greater within-  
212 island spatial coexistence via dispersal limitation, higher compositional heterogeneity, and thus  
213 greater total species richness on larger than on smaller islands.

214 Patterns of species compositional heterogeneity that emerge from these two distinct mechanisms  
215 are difficult to distinguish without explicit information on the characteristics of habitat  
216 heterogeneity itself, as well as how species respond to that heterogeneity. While we do not  
217 explicitly consider it further here, the spatial versus environmental drivers of compositional  
218 heterogeneity ( $\beta$ -diversity) can be more acutely disentangled if site-level environmental  
219 conditions and spatial coordinates are known by using standard methods in metacommunity  
220 ecology (e.g., Peres-Neto et al. 2006, Ovaskainen et al. 2017).

221 Finally, as with disproportionate effects above, opposite patterns are also possible. While we  
222 typically assume that heterogeneity increases with island area, leading to the positive ISAR, this  
223 need not be true. For example, smaller islands have higher perimeter:area ratios (i.e., edge  
224 effects), and thus can have higher levels of heterogeneity than larger islands by some measures.

## 225 **Disentangling ISAR Mechanisms with Observational Data**

226 As a result of the often impracticality of field experiments on the ISAR at realistic scales (but see  
227 Simberloff 1976), considerable attention has been paid towards developing sampling and  
228 analytical methodology that can allow a deeper understanding of potential ISAR mechanisms  
229 from observational data. However, these approaches have appeared piecemeal in the literature,  
230 are incomplete, and have not yet been synthesized into a single analytical framework.

231 Furthermore, two or more of these mechanisms can act in concert and are non-exclusive (e.g.,  
232 Chisholm et al. 2016). For example, the influence of passive sampling is likely always occurring  
233 in the background even when disproportionate effects and/or heterogeneity also influence ISAR  
234 patterns. Thus, even if we reject passive sampling as the sole mechanism leading to the ISAR  
235 via deviations from the null expectation, we cannot say that passive sampling does not at least  
236 partially influence the observed patterns. The same is true for any null modelling approach.  
237 Likewise, it is possible that disproportionate responses of species via alterations to spatial or  
238 local conditions can act in concert with changes in habitat heterogeneity. In this case, however,  
239 we can more completely falsify these processes by comparing patterns both within communities  
240 ( $\alpha$ -diversity) and among communities ( $\beta$ -diversity), as we will discuss in more detail below.

241 Here, we overview a generalized approach for disentangling the possible mechanisms underlying  
242 the ISAR. Our approach is based on recent work that uses an individual-based rarefaction  
243 framework (e.g., Gotelli and Colwell 2001) to calculate several measures of biodiversity at  
244 multiple spatial scales (e.g., Chase et al. 2018, McGlenn et al. 2018). And then to relate these  
245 measures to variation in island size. In a sense, then, we propose the use of within-island species  
246 richness relationships (Type II or Type III curves from Scheiner 2003, Scheiner et al. 2011) to  
247 evaluate the mechanisms underlying among-island ISAR relationships (Type IV curves from  
248 Scheiner 2003, Scheiner et al. 2011).

249 Figure 1a overviews the sampling design necessary on an island in order to calculate the  
250 parameters necessary to disentangle ISAR mechanisms. Specifically, in addition to estimating  
251 the total numbers of species on an island ( $S_{\text{total}}$ ), we advocate sampling multiple standardized  
252 plots within a given island (ideally stratified across the island and any potential habitat  
253 heterogeneity) so that a number of parameters can be derived and compared with island size.  
254 These parameters are described in Table 1 and can be visualized as components along individual-  
255 based rarefaction curves as in Figure 1b.

256 From the combination of all sampled plots within an island, one can generate a  $\gamma$ -rarefaction  
257 curve and several diversity parameters that can be derived from that information. We refer to the  
258 rarefied number of species expected from  $n$  randomly sampled individuals from the  $\gamma$ -rarefaction  
259 curve as  ${}^{\gamma}S_n$ . Because the  $\gamma$ -rarefaction curve is generated by combining all sample plots on a  
260 given island and randomly choosing individuals, any spatial heterogeneity in species associations  
261 is broken. In addition to  ${}^{\gamma}S_n$ , which weights common and rare species equally, we can also derive  
262 a measure which weights common species more heavily than rare species. Specifically,  
263 Hurlbert's (1971) Probability of Interspecific Encounter (PIE) is a measure of evenness in the  
264 community and is equivalent to the slope of the rarefaction curve at its base, as illustrated by the  
265 gray arrows in Figure 1b (e.g., Gotelli and Graves 1996, Olszewski 2004). We use the bias-  
266 corrected version,  $PIE = \left(\frac{N}{N-1}\right) * \left(1 - \sum_{i=1}^S p_i^2\right)$ , where  $N$  is the total number of individuals in  
267 the entire community,  $S$  is the total number of species in the community, and  $p_i$  is the proportion  
268 of each species  $i$ . For analyses, we convert PIE to an effective number of species (the number of  
269 species that would be observed if all of the species in a sample were equally abundant) (Jost  
270 2006), which we call  $S_{PIE} (=1/(1-PIE))$ . PIE is the same as 1-Simpson's diversity index, and  
271 when converted to an effective number of species, is part of the Hill continuum of diversity

272 numbers that places more weight on common species (whereas richness places equal weight on  
273 common and rare species) (e.g., Hill 1973, Jost 2006). When  $S_{PIE}$  is calculated from the  $\gamma$ -  
274 rarefaction curve, we refer to the effective number of species as  ${}^{\gamma}S_{PIE}$ . Note that only PIE, not  
275  $S_{PIE}$ , is illustrated in Figure 1b, because the forms of  $S_{PIE}$  are not readily illustrated in the  
276 individual-based rarefactions construct.

277 To discern whether any of the ISAR patterns emerge from within-island heterogeneity in species  
278 composition, we need to derive estimates of  $\beta$ -diversity. To do so, we can generate an  $\alpha$ -  
279 rarefaction curve and estimate diversity parameters similar to those above, but at the local  
280 (within plot) scale. From this, we can compare the parameters from the  $\gamma$ -rarefaction curve  
281 which eliminates any plot-to-plot variation due to heterogeneity in species composition by  
282 randomizing across the plots, to the  $\alpha$ -rarefaction curve calculated from individual plots (or a  
283 spatially defined subset of plots) which contains local information only (dashed line in Figure  
284 1b). The degree to which the  $\gamma$ -rarefaction curve (which eliminates spatial heterogeneity) differs  
285 from the  $\alpha$ -rarefaction curve (which keeps spatial heterogeneity) tells us how much local  
286 variation there is in species composition across sites, providing an index of  $\beta$ -diversity resulting  
287 from species aggregations (see Olszewski 2004, Chase et al. 2018, McGlenn et al. 2018). If the  
288  $\gamma$ -and  $\alpha$ -rarefaction curves are on top of each other, then we can conclude that there is no  
289 heterogeneity in the region. Alternatively, if the  $\alpha$ -rarefaction curve is far below the  $\gamma$ -  
290 rarefaction curve, this implies that intraspecific aggregation has created compositional  
291 heterogeneity in the community. Two  $\beta$ -diversity parameters are informative in this context:  $\beta_{S_n}$   
292 ( $={}^{\gamma}S_n/{}^{\alpha}S_n$ ) which indicates the influence of aggregation of all species, and  $\beta_{S_{PIE}}$  ( $={}^{\gamma}S_{PIE}/{}^{\alpha}S_{PIE}$ ),  
293 which indicates aggregations primarily by more common species (i.e., the effective number of  
294 unique communities; Tuomisto 2010).

295 In what follows, we discuss how this analytical methodology can be used to disentangle ISAR  
296 relationships where explicit sampling information from within and among islands is available.  
297 At the outset, it is important to note that in most of what follows, we focus exclusively on island  
298 systems where the primarily independent variable influencing species diversity is island size,  
299 with minimal variation in other diversity drivers. We focus on this because our goal is to  
300 elucidate and disentangle the ISAR, which describes a bivariate relationship between island size  
301 and species richness, and for which there remains much confusion and little synthesis.  
302 Nevertheless, as with all diversity studies, focusing on a single independent driver is a limiting  
303 case. In many island systems, islands vary in size as well as other drivers (e.g., productivity,  
304 isolation). Nevertheless, it is quite straightforward to extend the approach that we advocate  
305 below to include these complexities and still disentangle the influence of island size in the  
306 context of the ISAR. In such cases, one could simply use these other potential drivers as  
307 covariates with island size in an analysis focusing on the response variables we overview in  
308 Table 1 and Figure 1, using the same framework as described below. Or one could add more  
309 complexity by including these independent variables in a hierarchical model or structural  
310 equation model with the same response variables, which we discuss in more detail in the  
311 conclusions below (see e.g., Blowes et al. 2017, Chase et al. 2018 for similar analyses in a  
312 different context).



313

314

315 **Table 1. Parameters used to disentangle island species area relationship patterns**

| Parameter                                                                                                                          | Description                                                                                                                                                                                                                                                                                       |
|------------------------------------------------------------------------------------------------------------------------------------|---------------------------------------------------------------------------------------------------------------------------------------------------------------------------------------------------------------------------------------------------------------------------------------------------|
| <b><i>Island-level patterns</i></b>                                                                                                |                                                                                                                                                                                                                                                                                                   |
| $S_{total}$                                                                                                                        | Total number of species on an entire island. Estimated independently or with extrapolations from samples.                                                                                                                                                                                         |
| $N$                                                                                                                                | Number of individuals of all species found in a given sampling plot (usually expected to scale linearly with effort)                                                                                                                                                                              |
| <b><i><math>\gamma</math>-level patterns (derived by combining all sample plots on an island)</i></b>                              |                                                                                                                                                                                                                                                                                                   |
| ${}^{\gamma}S_n$                                                                                                                   | Number of species expected from $n$ randomly sampled individuals from the $\gamma$ -rarefaction curve                                                                                                                                                                                             |
| ${}^{\gamma}S_{PIE}$                                                                                                               | Effective number of species given the probability of interspecific encounter (PIE) from the $\gamma$ -rarefaction curve                                                                                                                                                                           |
| <b><i><math>\alpha</math>-level patterns (derived from a single sampling plot or subset of plots on an island)</i></b>             |                                                                                                                                                                                                                                                                                                   |
| ${}^{\alpha}S_n$                                                                                                                   | Number of species expected from $n$ randomly sampled individuals from the $\alpha$ -rarefaction curve                                                                                                                                                                                             |
| ${}^{\alpha}S_{PIE}$                                                                                                               | Effective number of species given the probability of interspecific encounter (PIE) from the $\alpha$ -rarefaction curve                                                                                                                                                                           |
| <b><i><math>\beta</math>-level patterns (derived from comparing <math>\gamma</math> to <math>\alpha</math>-level patterns)</i></b> |                                                                                                                                                                                                                                                                                                   |
| $\beta_{S_n}$                                                                                                                      | Ratio of numbers of species expected for a given $n$ from $\gamma$ -rarefaction curve to those expected for a given $n$ from $\alpha$ -rarefaction (a measure of compositional heterogeneity) ( ${}^{\gamma}S_n/{}^{\alpha}S_n$ )                                                                 |
| $\beta_{S_{PIE}}$                                                                                                                  | Ratio of numbers of effective number of species for a given PIE from $\gamma$ -rarefaction curve to the effective number of species for a given PIE from $\alpha$ -rarefaction (a measure of compositional heterogeneity emphasizing common species) ( ${}^{\gamma}S_{PIE}/{}^{\alpha}S_{PIE}$ ). |

316

317

318 **Figure 1.**

319

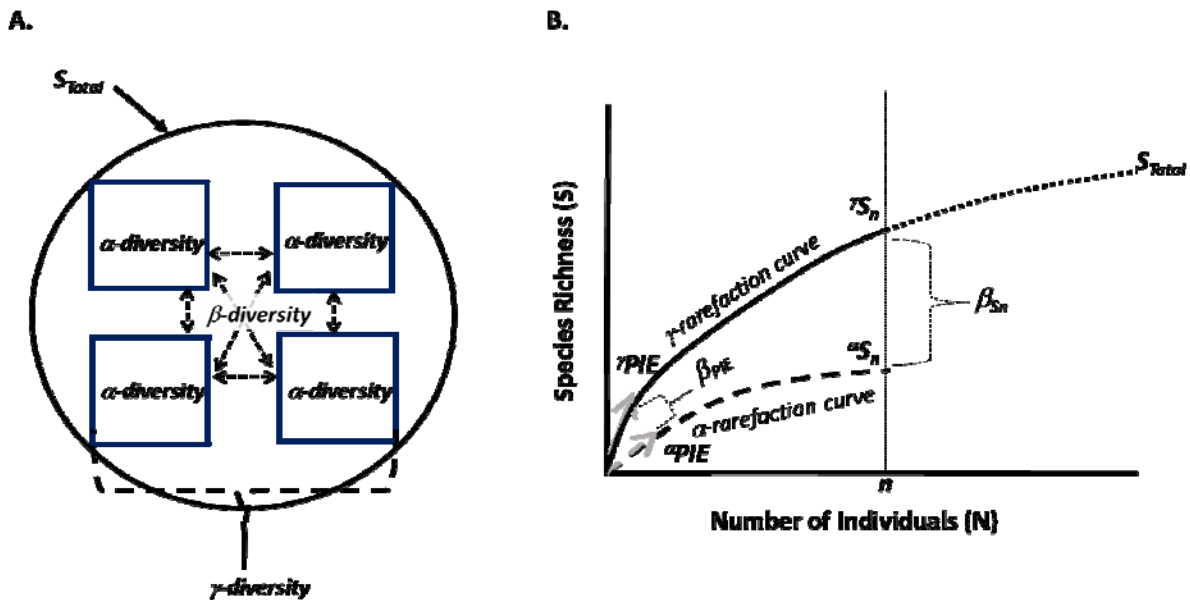

320

321 *Figure 1.* A. Overview of a sampling scheme appropriate for applying the analytical approach  
 322 outlined in this paper. The circle represents a hypothetical island, and each of the four squares  
 323 represents individual sampling plots from which  $\alpha$ -diversity metrics can be derived. The  
 324 addition of all of the individuals sampled in all of the plots allows the calculation of  $\gamma$ -diversity  
 325 metrics, while the differences among the  $\alpha$ -diversity plots is  $\beta$ -diversity.  $S_{total}$  represents the  
 326 total number of species on the island, including those that were not observed in any of the  
 327 sampled plots. B. Illustration of how these diversity indices can be visualized graphically from  
 328 individual-based rarefaction curves that plot species richness ( $S$ ) against the numbers of  
 329 individuals ( $N$ ) across scales. The  $\gamma$ -rarefaction curve (solid line) is derived by combining all  
 330 individuals from all plots measured on a given island and randomizing individuals to generate  
 331 the curve. From this curve, the dashed line allows us to visualize the total number of species on  
 332 the island including those that were not sampled in any plot ( $S_{total}$ ). We can also visualize: (i) the  
 333 numbers of species expected from a given  $n$ ,  $\gamma S_n$  (where the vertical dashed line at  $n$  intersects  
 334 the solid curve) (ii) the probability of interspecific encounter (PIE), which represents the slope at  
 335 the base of the rarefaction curve,  $\gamma PIE$  (solid grey arrow). The  $\alpha$ -rarefaction curve (dashed line)  
 336 is derived by randomizing individuals from a single plot, and similar parameters can be derived  
 337 —  $\alpha S_n$  (vertical dashed line intersects the dashed curve) and  $\alpha PIE$  (dashed grey arrow). The ratio  
 338 between the  $\gamma$ - and  $\alpha$ -rarefaction curves provides estimates of  $\beta$ -diversity that indicate the degree  
 339 of intraspecific aggregation on the island. Note, in text, we advocate converting PIE values into  
 340 effective numbers of species ( $S_{PIE}$ ), but only illustrate PIE in the figure, as it is not  
 341 straightforward to illustrate  $S_{PIE}$  on these axes.

342

343 ***Question 1: What is the shape of the overall ISAR?***

344 ***Parameter analyzed: Total number of species on an island ( $S_{total}$ )***

345  $S_{total}$  is the most straightforward ISAR variable one can measure. The ideal way to estimate  $S_{total}$   
346 is from independent information, such as exhaustive searching or checklists of species known to  
347 occur on a given island. However, because this information is often unavailable,  $S_{total}$  can be  
348 estimated via techniques for predicting the number of species in a given extent (e.g., Colwell and  
349 Coddington 1994, Harte et al. 2009, Chao and Jost 2012, Chao and Chiu 2014, Azaele et al.  
350 2015). None of these approaches are perfect, and we are agnostic as to which approach is best  
351 for estimating  $S_{total}$  when complete species lists are not available. However, in our case studies  
352 below, we use the Chao (1984) non-parametric estimator to extrapolate the total number of  
353 species on a given island because it can be mathematically and conceptually linked to the  
354 rarefaction curves that we use (Colwell et al. 2012). However, this can only be viewed as a  
355 minimum expected  $S_{total}$ , and will likely underestimate the true  $S_{total}$ .

356 While  $S_{total}$  is the fundamental parameter of interest to calculate an ISAR, it alone provides little  
357 information as to the nature of its potential underlying mechanisms. This is because  $S_{total}$  is  
358 influenced by a number of underlying parameters, including the density of individuals, the  
359 relative abundances of species, and the intraspecific aggregation or spatial heterogeneity  
360 exhibited by species. Thus, to disentangle the factors underlying variation in  $S_{total}$ , we need to  
361 look deeper into these underlying components, which we can do using the parameters  
362 overviewed in Table 1 and Figure 1b (see also Chase et al. 2018, McGlenn et al. 2018).

363 ***Question 2: Does the ISAR result differ from what is expected from random sampling?***

364 ***Parameter Analyzed: Number of species expected from the  $\gamma$ -rarefaction curve ( ${}^{\gamma}S_n$ )***

365 If patterns of the ISAR were generated simply by the random sampling hypothesis, we would  
366 expect that  $\gamma$ -rarefaction curves of small and large islands would fall right on top of each other  
367 (whereas the curve would go farther along the x-axis for the larger island, because more total N  
368 are present on larger islands) (Figure 2a). If the  $\gamma$ -rarefaction curves between smaller and larger  
369 islands differ, which we can quantify by comparing  ${}^{\gamma}S_n$  among islands (Figure 2b), then we can  
370 conclude that something other than random sampling influences the ISAR. This is essentially  
371 the same procedure as that described by the random placement approach (Coleman 1981,  
372 Coleman et al. 1982).

373  
374 If  ${}^{\gamma}S_n$  increases with increasing island area, this means that more species can persist for a given  
375 sampling effort on larger than smaller islands. We can go one step further in describing this  
376 pattern by examining how island size influences the relative commonness and rarity of species.  
377 If island area influences the  $\gamma$ -rarefaction curve via an overall decrease in evenness of both  
378 common and (as shown in Figure 2b), we would expect that both  ${}^{\gamma}S_n$  and  ${}^{\gamma}S_{PIE}$  would change.  
379 However, if only relatively rarer species are disproportionately influenced by island area (not  
380 shown in figure), we would expect that  ${}^{\gamma}S_n$  would increase with increasing island area, but there  
381 should be little to no effect on  ${}^{\gamma}S_{PIE}$ . Importantly, the slope of the  ${}^{\gamma}S_n$  with island size very much

382 depend on exactly which  $n$  is used in the calculations, with steeper slopes observed at higher  $n$ .  
383 This is similar to what was observed by Karger et al. (2014) on islands in Southeast Asia.

384  
385 It is important to note that the hypotheses of increasing  ${}^nS_n$  and/or  ${}^nS_{PIE}$  with increasing island  
386 area, as illustrated in Figure 2b are not the only possibilities. Estimates of diversity from  
387 samples, such as  ${}^nS_n$  and/or  ${}^nS_{PIE}$ , could certainly decrease with increasing island size. For  
388 example, on islands that result from habitat fragmentation and/or those that are surrounded by a  
389 relatively hospitable matrix, there are several mechanisms (e.g., habitat spillover) that can lead to  
390 higher levels of diversity (both in  $S_{total}$  as well as from samples [ ${}^nS_n$  and/or  ${}^nS_{PIE}$ ]) in smaller  
391 relative to larger islands (e.g., Ewers and Doham 2006, Fahrig 2017).

392  
393 Even if the numbers of species (and evenness) for a given sampling effort ( ${}^nS_n$  and/or  ${}^nS_{PIE}$ )  
394 declines, this can be outweighed by the random sampling effect, leading to an overall increasing  
395 ISAR even with decreasing components of diversity with increasing area. This emphasizes the  
396 fact that ISAR mechanisms are not mutually exclusive. That is, random sampling effects are  
397 likely always operating (as evidenced by the increase in species richness with increasing  $N$  along  
398 the rarefaction curve), even when disproportionate effects and/or heterogeneity also influence the  
399 ISAR pattern. As such, we can use rarefaction curves to examine whether random sampling is  
400 the only mechanism operating, as it would be if there is no influence of island size on  ${}^nS_n$ , and as  
401 a result, conclude that differential effects and/or heterogeneity are not operating. However, we  
402 cannot conversely say that random sampling is not operating if there is a relationship between  ${}^nS_n$   
403 and island size. This is because random sampling effects are always operating anytime there are  
404 fewer species on a given island than the total numbers of species in the regional species pool.

405  
406 Finally, our discussion above implicitly assumed that island size changes the total number of  
407 individuals on an island via passive sampling, but not the density of individuals in a given  
408 sampled area. However, there are also reasons that island size can influence individual density.  
409 For example, if larger islands are more favorable for some reason, the total numbers of  
410 individuals would increase both because island size increases, as well as because the density in a  
411 given sampled area increases. Alternatively, smaller islands could contain more individuals for a  
412 given area (higher density) if there is high spillover from the matrix into smaller islands, or if  
413 larger islands have less favorable habitats. In such cases, comparisons of  ${}^nS_n$  are still necessary  
414 to test the null hypothesis of whether the ISAR results from random sampling or not. However,  
415 when  $N$  varies with island size, it will also be useful to compare estimates of  $S$  at the scale of the  
416 sample rather than the number of individuals (i.e., sampled-based estimates sensu Gotelli and  
417 Colwell 2001, McGlenn et al. 2018) to determine how changes in  $N$  influence the ISAR.

418

419

420

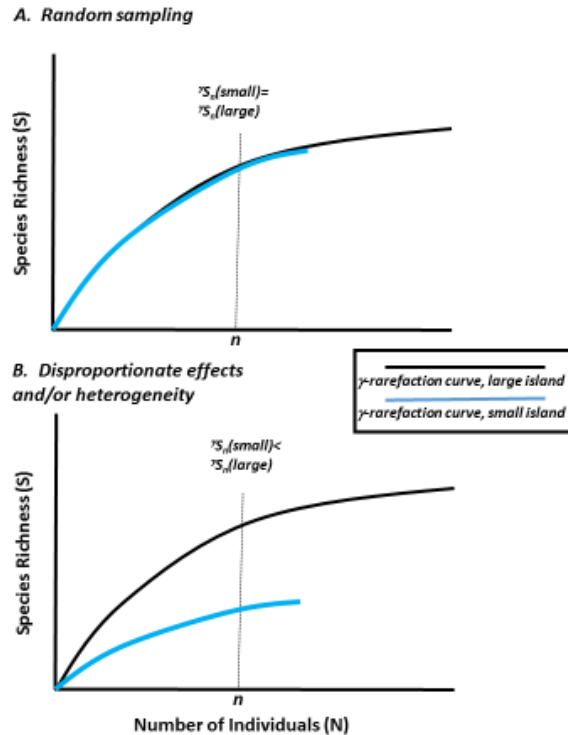

421  
422

423 Figure 2. A. Hypothetical case where a large island has more species than a smaller island in  
424 total, but this entirely because of random sampling (the larger island has more total individuals).  
425 Note that the rarefaction curves for each island fall on top of each other, and the parameters  
426 derived from it, including  ${}^{\gamma}S_n$  and  ${}^{\gamma}S_{PIE}$  (not shown) are the same between larger and smaller  
427 islands. B. Hypothetical case where a large island has more species than a smaller island, and  
428 this results because both a sampling effect (the larger island has more  $N$ , and goes farther down  
429 the x-axis) as well as a disproportionate effect whereby  ${}^{\gamma}S_n$  is lower on the smaller than the larger  
430 island.  ${}^{\gamma}S_{PIE}$  in this case (not illustrated) is also smaller on the smaller island (because it has a  
431 shallower slope), but this need not be the case if only rarer species are affected.

432  
433

434  
435

436 **Question 3: Does the ISAR result from disproportionate effects or from heterogeneity**  
437 **Parameter analyzed:  $\beta$ -diversity as the difference between the  $\gamma$ -rarefaction curve and  $\alpha$ -**  
438 **rarefaction curve.**

439

440 If there is a relationship between  ${}^{\gamma}S_n$  and/or  ${}^{\gamma}S_{PIE}$  and island area, we can conclude that there is  
441 something other than random sampling influencing the ISAR. With only the parameters from  
442 the  $\gamma$ -rarefaction curve, however, we cannot yet discern whether this is due to disproportionate  
443 effects that are equally distributed across the island, or whether these effects emerge because of  
444 heterogeneity in species composition across the island (i.e., different species and relative

445 abundances in different parts of the island). To disentangle disproportionate effects from  
446 heterogeneity, we must look more closely into the variation in species abundances and  
447 composition within an island—that is, within-island  $\beta$ -diversity.

448 If  $\beta_{S_n}$  has no relationship with island size, then we can reject the heterogeneity hypothesis  
449 (Figure 3a; note, in the figure, we have illustrated that  $\beta_{S_n}$  is 1, indicating there is no  
450 heterogeneity due to aggregation; however, this hypothesis would also be true if  $\beta_{S_n} > 1$ , but does  
451 not significantly vary with island size). However, if  $\beta_{S_n}$  increases with island size, then we  
452 conclude that heterogeneity plays at least some role in the generation of the ISAR. If the ISAR  
453 is primarily driven by heterogeneity, we would expect there to be no relationship between  ${}^{\alpha}S_n$   
454 and island size, but a strong relationship with  ${}^{\gamma}S_n$ , giving us a significant  $\beta_{S_n}$  relationship with  
455 island size (Figure 3b). Such a pattern was observed by Sfenthourakis and Panitsa (2012) for  
456 plants on Greek islands in the Aegean Sea. In Figure 3b, we have illustrated a case where  
457 heterogeneity influences rare as well as common species, indicating an effect on both  $\beta_{S_n}$  and  
458  $\beta_{S_{PIE}}$  (not shown, but implied because the slope at the base of the curve [i.e., PIE] is influenced).  
459 However, it is also possible that heterogeneity can influence just the rarer, but not more common  
460 species, wherein we would expect an effect on  $\beta_{S_n}$ , but not  $\beta_{S_{PIE}}$  (not shown in Figure).

461 It is quite possible that both disproportionate effects and heterogeneity occur simultaneously and  
462 in the same direction, in which case, we would expect a significant relationship between  ${}^{\alpha}S_n$  and  
463 island size (indicating disproportionate effects) and stronger relationship between  ${}^{\gamma}S_n$  island size,  
464 giving a significant relationship between island size and  $\beta_{S_n}$  (not shown in Figure). On the other  
465 hand, disproportionate effects and heterogeneity mechanisms can act in opposition to one  
466 another. For example, the area-heterogeneity trade-off hypothesis assumes that as heterogeneity  
467 increases, the amount of area of each habitat type declines when total area is held constant  
468 (Kadmon and Allouche 2007, Allouche et al. 2012). Although perhaps not a common scenario  
469 (e.g., Hortal et al. 2009), if the types of habitats increase with island area, while the total amount  
470 of each habitat type declines, we might expect  ${}^{\alpha}S_n$  and/or  ${}^{\alpha}S_{PIE}$  to decline, while  ${}^{\gamma}S_n$  and/or  ${}^{\gamma}S_{PIE}$   
471 can increase, remain unchanged or decrease, depending on the degree to which the heterogeneity  
472 effect is overcome by disproportionate effects (not shown).

473 Finally, if there is a significant relationship between  $\beta_{S_n}$  and/or  $\beta_{S_{PIE}}$  with island area, we can  
474 conclude that compositional heterogeneity likely underlies the ISAR, but we cannot infer  
475 whether this is due to habitat heterogeneity or dispersal limitation. To disentangle the relative  
476 importance of these mechanisms, it would be necessary to have additional information; for  
477 example, on the environmental conditions from different locations from within an island, and  
478 how species compositional heterogeneity was related to those conditions (see e.g., Leibold and  
479 Chase 2017 for an overview of approaches aimed at disentangling these).

**A. No Heterogeneity Effect**

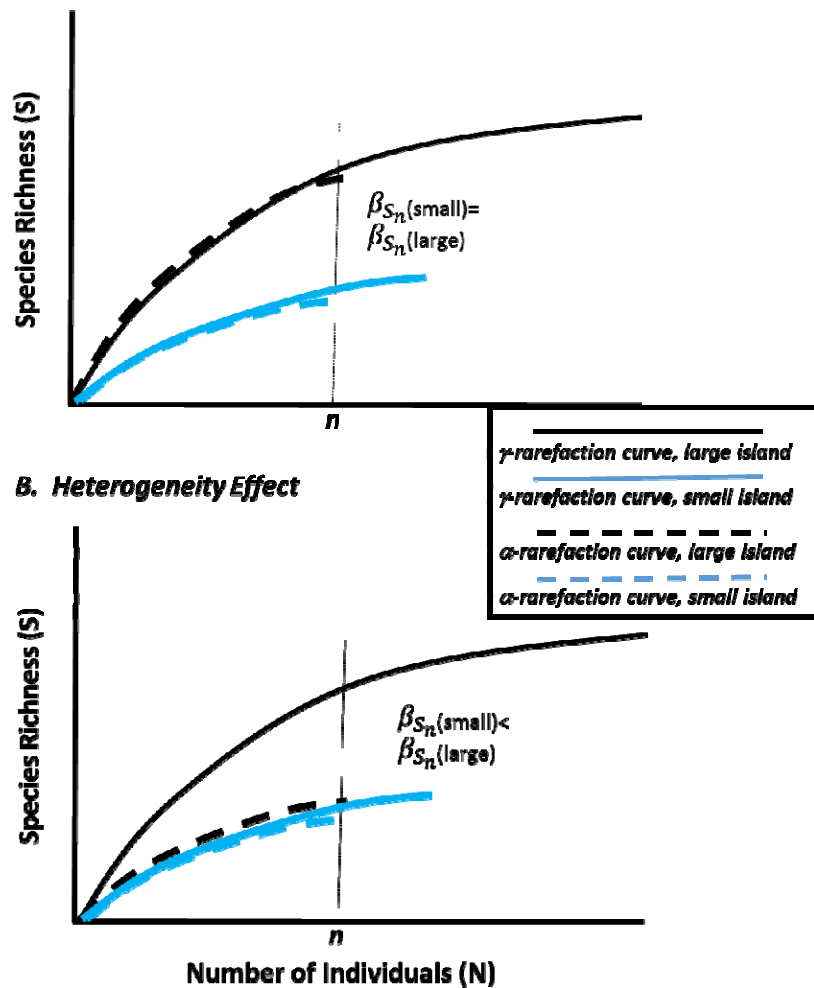

480

481

482 Figure 3. A. A hypothetical case where there is no heterogeneity in species composition within  
 483 islands (the  $\alpha$ - and  $\gamma$ -rarefaction curves completely overlap), such that  $\beta_{S_n} = 1$ . And this does not  
 484 vary with island size. Note, that it is also possible that  $\beta_{S_n} > 1$ , but we would conclude  
 485 no heterogeneity effect underlying the ISAR if this is not influenced by island size. B. A case where  
 486 there is heterogeneity in species composition in the larger island (the  $\alpha$ - and  $\gamma$ -rarefaction curves  
 487 differ), but not the smaller. And thus, there is a positive relationship between compositional  
 488 heterogeneity (  $\beta_{S_n}$  and/or  $\beta_{S_n}$  ) island size. In this case, note that the  $\alpha$ - rarefaction curves  
 489 between the larger and smaller island overlap, and the island-effect is just observed at the  $\gamma$ -level,  
 490 indicating the ISAR results solely from heterogeneity. This need not be the case, however, and  
 491 other complexities can arise (see text).

492

493 **Caveat:** Our approach, like all rarefaction-based analyses, assumes that sampling strategies can  
 494 clearly identify and enumerate individuals of each species. Unfortunately, enumeration of  
 495 individuals is much more difficult or impossible in certain kinds of communities (e.g.,  
 496 herbaceous plants, corals). Nevertheless, there are some ‘workaround’ solutions that can be used  
 497 to apply the rarefaction techniques we have advocated to data where numbers of individuals are  
 498 not available, but other measures of relative abundance are (e.g., percent cover or occupancy).  
 499 For example, one can convert percentages of a species to individuals via a multiplier. In such a  
 500 case, the meaning of PIE,  $S_n$  and aggregation measures change slightly, but can be calculated.  
 501 Alternatively, one can collect presence-absence data on species in many quadrats within a  
 502 locality. The presence of a species in a quadrat can be taken as a proportion and given the often  
 503 strong correlation between abundance and occupancy (e.g., Gaston et al. 2000, Borregaard and  
 504 Rahbek 2010), converted to an estimate of percent cover and converted as above. Again, while  
 505 the interpretation of the parameters measured above cannot be taken literally, they provide a  
 506 useful way to compare multiple diversity measures (at multiple scales) so that the framework we  
 507 advocate can be applied.

#### 508 **Case studies:**

509 Next, we illustrate how to use our analytical framework to test the ecological mechanisms  
 510 underlying the ISAR with examples from three datasets representing different taxa and island  
 511 settings. (1) Lizards sampled from several islands in the Andaman and Nicobar archipelago in  
 512 the Indian Ocean (data from Surendran and Vasudevan 2015a,b); (2) Grasshoppers (Orthoptera)  
 513 from Ozark glades, which are rocky outcrop prairies that represent island-like patches in a  
 514 forested ‘sea’ (data from Ryberg and Chase 2007, Ryberg 2009); (3) plants from island-like  
 515 habitat fragments of desert/Mediterranean scrub within an agriculture matrix (data from Giladi et  
 516 al. 2011). For each case study, we present a brief overview of the system, results, and an  
 517 interpretation of the results. We only used data from islands where multiple plots were censused;  
 518  $\gamma$ -measures included all of these plots, while  $\alpha$ -measures were taken as the average among plots.  
 519 Results are presented in Table 1 and Figure 4.

520 All analyses were performed in R version 3.5.0 (R Core Team (2018)). For each system, we did  
 521 not have independent estimates of  $S_{total}$ , and so we used extrapolation using iNEXT (Hsieh et al.  
 522 2018). We also used iNEXT to calculate rarefied richness values ( $S_n$ ).  $S_{PIE}$  was calculated using  
 523 Vegan (Oksanen et al. 2017). Plots were generated using ggplot2 (Wickham 2016). Code and  
 524 data for these analyses are available at [https://github.com/Leana-Gooriah/ISAR\\_analysis](https://github.com/Leana-Gooriah/ISAR_analysis)

525 Table 2: Linear regression coefficients and fits for each response in each case study.

526 Coefficients are only given when the slope was significantly different from zero.

| System                                    | Response         | Intercept | Slope | R <sup>2</sup> | p-value |
|-------------------------------------------|------------------|-----------|-------|----------------|---------|
| <b>Lizards on<br/>Oceanic<br/>Islands</b> | $S_{total}$      | 0.59      | 0.23  | 0.76           | <0.0001 |
|                                           | $\gamma S_n$     | 0.69      | 0.15  | 0.51           | 0.008   |
|                                           | $\gamma S_{PIE}$ | -         | -     | -              | 0.1     |
|                                           | $\alpha S_n$     | 0.86      | 0.09  | 0.36           | 0.003   |
|                                           | $\alpha S_{PIE}$ | 0.61      | 0.10  | 0.28           | 0.05    |



|                                               |                   |       |      |      |               |
|-----------------------------------------------|-------------------|-------|------|------|---------------|
|                                               | $\beta_{S_n}$     | -0.20 | 0.04 | 0.34 | <b>0.03</b>   |
|                                               | $\beta_{S_{PIE}}$ | -     | -    | -    | 0.37          |
|                                               |                   |       |      |      |               |
| <b>Grasshoppers<br/>in Ozark<br/>Glades</b>   | $S_{Total}$       | 0.87  | 0.25 | 0.30 | <b>0.0001</b> |
|                                               | $\gamma S_n$      | 0.45  | 0.16 | 0.19 | <b>0.01</b>   |
|                                               | $\gamma S_{PIE}$  | 0.18  | 0.18 | 0.35 | <b>0.0005</b> |
|                                               | $\alpha S_n$      | -0.02 | 0.2  | 0.18 | <b>0.013</b>  |
|                                               | $\alpha S_{PIE}$  | -0.39 | 0.22 | 0.25 | <b>0.004</b>  |
|                                               | $\beta_{S_n}$     | -     | -    | -    | 0.54          |
|                                               | $\beta_{S_{PIE}}$ | -     | -    | -    | 0.33          |
|                                               |                   |       |      |      |               |
| <b>Plants in<br/>fragmented<br/>scrubland</b> | $S_{total}$       | 3.61  | 0.24 | 0.37 | <b>0.03</b>   |
|                                               | $\gamma S_n$      | -     | -    | -    | 0.13          |
|                                               | $\gamma S_{PIE}$  | -     | -    | -    | 0.71          |
|                                               | $\alpha S_n$      | -     | -    | -    | 0.17          |
|                                               | $\alpha S_{PIE}$  | -     | -    | -    | 0.85          |
|                                               | $\beta_{S_n}$     | -     | -    | -    | 0.57          |
|                                               | $\beta_{S_{PIE}}$ | -     | -    | -    | 0.56          |

527

528

529 **Figure 4.**

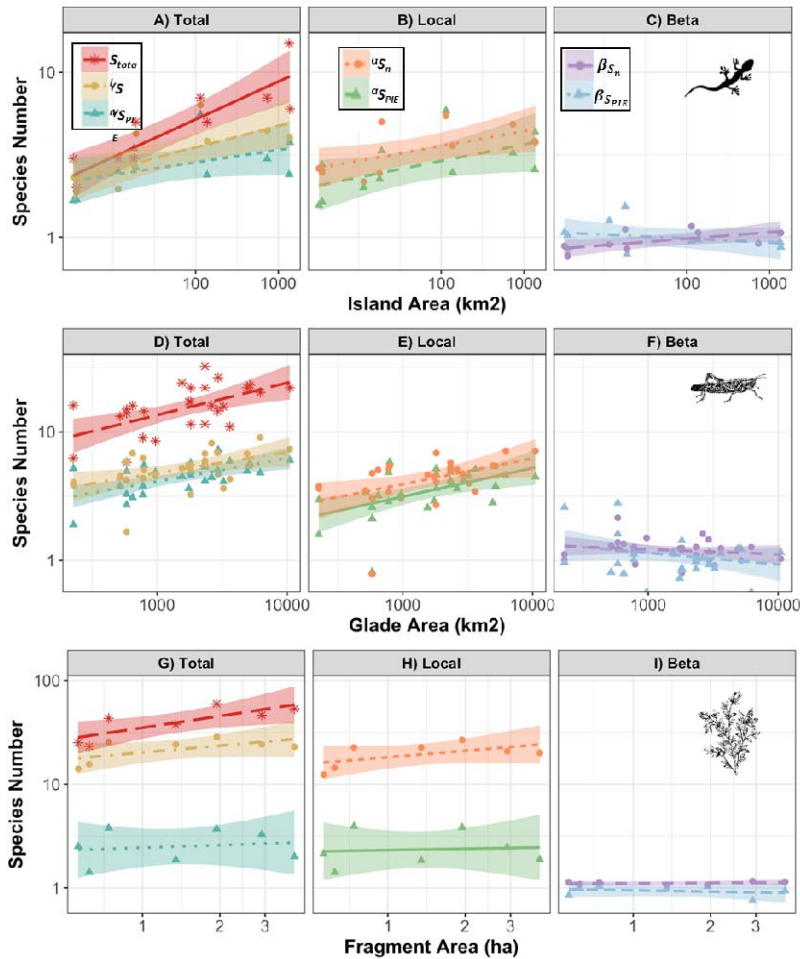

530

531 **Figure 4.** Log-log plots from the three case studies provided above. Each row represents results  
 532 from a different case study; top row is for the lizards on the Andaman Islands; middle row is for  
 533 the grasshoppers in Ozark glades; bottom row is for plants in Israeli fragments. Panels A,D,G  
 534 represent parameters derived from the regional scale, including  $S_{total}$  (the number of species  
 535 estimated on the total island),  $S_n$  (the number of species expected for a minimum N measured  
 536 across plots), and  $S_{PIE}$  (the effective number of species given PIE across plots) (see text for  
 537 explanation). Panels B, E, H represent parameters derived from the local scale, including  $\alpha S_n$   
 538 (the number of species expected for a minimum n measured in a single plot) and  $\alpha S_{PIE}$  (the  
 539 effective number of species given PIE within a plot). Panels C, F, I represent parameters derived  
 540 from comparing the local and regional scale (=β-diversity), including  $\beta_{S_n}$  (the difference which  
 541 represents heterogeneity in rare and common species), and  $\beta_{S_{PIE}}$  (the difference which represents  
 542 heterogeneity in common species). Coefficients and significance values are given in Table 1.  
 543 Images are CC0 Creative Commons, with no attribution required.

544

545 **Lizards on Oceanic Islands**—The Andaman and Nicobar islands are a relatively pristine island  
546 archipelago in the Indian Ocean. A variety of taxa on these islands have been the subject of  
547 island biogeography studies, including ISAR studies (e.g., Davidar et al. 2001, 2002). Here, we  
548 used data from Surendran and Vasudevan (2015a,b) who intensively sampled lizards in 100 m<sup>2</sup>  
549 quadrats from 11 islands that varied from 3.3 to 1375 km<sup>2</sup> in area. We only used data from  
550 islands where two or more quadrats were censused.

551 As expected, we found a strong increase in our estimate of  $S_{total}$  as island size increased. We also  
552 found that  $\gamma S_n$  increases significantly with island area, allowing us to reject the null hypothesis  
553 that the ISAR is driven by random sampling effects. However, the relationship between  $\gamma S_{PIE}$   
554 and island area was not significant (Table 2, Figure 4a). A slightly different pattern emerged at  
555 the local scale (Figure 3b), with individual quadrats on larger islands having more species ( $\alpha S_n$ )  
556 that were less uneven in species composition ( $\alpha S_{PIE}$ ) than on smaller islands. Because there were  
557 significant relationships between island size and both the  $\gamma$ -scale and  $\alpha$ -scale measures, we can  
558 conclude that disproportionate effects played at least some role in driving the ISAR on these  
559 islands. Without additional information, we cannot say for certain exactly which spatial  
560 mechanisms are operating to allow more even communities, and more species co-occurring in  
561 local quadrats on larger compared to smaller islands. However, because  $\beta S_n$  also increased with  
562 island size, this indicates that there was at least some influence of heterogeneity on the ISAR.  
563 This heterogeneity effect was only observed among the rarer species, but not the more common  
564 species, because there was no concomitant relationship between  $\beta S_{PIE}$  and island size. From  
565 other studies in these islands, we know that habitat heterogeneity does generally increase with  
566 island size (Davidar et al. 2001, 2002), and so suspect this relationship influenced heterogeneity  
567 in lizard composition from quadrat to quadrat more on larger relative to smaller islands.

568 **Grasshoppers in Ozark Glades**—Ozark glades are patchy island-like habitats within  
569 Midwestern forested ecosystems that contain xeric adapted herbaceous plant communities  
570 together with associated fauna (Ware 2002). Grasshoppers are diverse and abundant herbivores  
571 that are known to respond to local and spatial processes in these patchy ecosystems (e.g., Östman  
572 et al. 2007, Ryberg and Chase 2007). Here, we use data collected by Ryberg (2009) from area-  
573 standardized sweep sample transects (each sample represented 50 sweeps taken from a transect  
574 covering approximately 50 m<sup>2</sup>) taken from within glades without predatory lizards which varied  
575 from 0.02 to 1.05 ha (ranging from four transects on the smallest glade to 32 on the largest).

576 As with the lizards above, we find that  $S_{total}$  increases with island size, as does  $\gamma S_n$ . Furthermore,  
577 in this case,  $\gamma S_{PIE}$  also increased with island size (Table 2, Figure 4d). A similar pattern is  
578 reflected at the local scale (Figure 4e). Thus, again, we can reject the null hypothesis that the  
579 ISAR emerges from random sampling, and instead we see a clear signal for disproportionate  
580 effects influencing both the number of species and their relative abundances. We suspect that  
581 one reason for this was because we only used glades that were relatively isolated from one  
582 another, and these grasshoppers do not readily disperse through the matrix. And thus, local  
583 processes likely outweighed any regional-level sampling effects. Unlike the lizards, however,  
584 we found no effect of glade size on  $\beta$ -diversity of grasshoppers between sweep samples within a  
585 glade (Figure 4F), suggesting that the ISAR did not likely result from increased levels of

586 heterogeneity in larger glades, but rather from spatial processes associated with disproportionate  
587 effects. This is despite the fact that we know that heterogeneity in microhabitat types does  
588 increase with increasing glade size (Ryberg 2009). We suspect that the fact that these  
589 grasshoppers are rather mobile within glades was a reason that heterogeneity in species  
590 composition did not emerge among glades that varied in size. Unfortunately, however, without  
591 further information, we cannot say exactly what sorts of mechanisms allowed more species of  
592 grasshoppers to persist in larger glades than expected from random sampling.

593 **Plants in fragmented scrubland**—Xeric scrub habitat in Israel was once quite extensive, but  
594 has been severely fragmented such that remnant habitats can be thought of as islands within a sea  
595 of agriculture (mostly wheat fields). These fragments have been the subject of intensive research  
596 on a number of organisms, including plants and several groups of animals (e.g., Yaacobi et al.  
597 2007, Giladi et al. 2011, 2014, Gavish et al. 2012). Here, we used data from the Dvir region  
598 from the study by Giladi et al. (2011) on plants identified and enumerated in two or three 225 m<sup>2</sup>  
599 quadrats within seven fragments varying from 0.56 to 3.90 ha.

600 Again, we found that  $S_{\text{total}}$  increased with fragment area, indicating a positive ISAR relationship.  
601 However, in this case, there were no significant relationships with  ${}^{\gamma}S_n$  or  ${}^{\gamma}S_{\text{PIE}}$  (Table 2, Figure  
602 4g), any of the metrics from the  $\alpha$ -rarefaction curve (Figure 4h), nor any of the  $\beta$ -scale metrics  
603 (Figure 4i). In this case, then, we are not able to reject the null hypothesis and instead conclude  
604 that the ISAR in these fragmented habitats is most consistent with the idea of random sampling.  
605 Even though we used different (and in our opinion, more robust) analytical tools, our results are  
606 qualitatively similar to those derived by the authors of the original study (Giladi et al. 2011). In  
607 this case, these results would indicate one of two general possibilities. First, it could be that  
608 these plants disperse well enough across the matrix that habitat size does not strongly influence  
609 local population dynamics. Second, it could be that local population dynamics do not depend on  
610 the numbers of individuals and types of species in local neighborhoods, at least during the time  
611 scale in which habitat fragmentation has taken place.

## 612 **Discussion and Conclusions**

613 The island species-area relationship (ISAR)—depicting how the numbers of species increase  
614 with the size of the island or habitat patch—is one of the most well-known patterns in  
615 biogeography. Understanding the ISAR and the processes leading to it is not only important for  
616 basic ecological knowledge, but is also of critical importance for biodiversity conservation in the  
617 context of habitat loss and fragmentation. Despite this, the study of the ISAR continues to be  
618 difficult to synthesize, primarily because of the confusion about the confounding influence of  
619 sampling effects and spatial scale on the ISAR. For example, previous syntheses of the ISAR in  
620 natural and fragmentation contexts have focused on estimates of species richness at the entire  
621 island scale (e.g., Triantis et al. 2012, Matthews et al. 2016). Other syntheses, however, have  
622 confounded species richness measurements from multiple scales and contexts, making  
623 comparisons within and among studies difficult (e.g., Drakare et al. 2006, Smith et al. 2005,  
624 Fahrig 2017). As we have shown here, it is important to understand and report how species  
625 richness was sampled in order to interpret ISAR results. This is particularly true in the realm of  
626 conservation biology, where the influence of habitat loss and fragmentation on biodiversity is a

627 critically important, but also controversial topic. In fact, a great deal of the controversy (e.g.,  
628 Haddad et al. 2015, 2017, Hanski 2015, Fahrig 2013, 2017, Fletcher et al. 2018) is likely  
629 attributable to different investigators using different sampling procedures, different analyses, and  
630 different spatial scales for their comparisons, and thus comparing apples to oranges.

631 We are not alone in this call for a more careful consideration of sampling when measuring and  
632 interpreting ISARs (Hill et al. 1994, Schroeder et al. 2004, Yaacobi et al. 2007, Giladi et al.  
633 2011, 2014, Sfenthourakis and Panitsa 2012, Karger et al. 2014). However, our approach, using  
634 metrics derived from  $\gamma$ - and  $\alpha$ -rarefaction curves, provides an important advance over previous  
635 approaches by allowing one to more explicitly examine the influence of sampling and scale on  
636 the outcome. As our case studies illustrate, we can use this approach to explicitly disentangle the  
637 main hypotheses suspected to underlie the ISAR (random sampling, disproportionate effects and  
638 heterogeneity). For example, the case study on fragmentation in Israeli scrub habitats indicated  
639 that random sampling was primarily responsible for the ISAR. Interestingly, this result is similar  
640 to that found by Coleman et al. (1982) in their original use of this approach to another  
641 fragmented system; birds on islands within a flooded reservoir. Such results might be expected  
642 if species can readily use the matrix between habitat islands, or can easily disperse among  
643 habitats. Alternatively, in both the lizard and grasshopper systems, species are less likely to use  
644 the matrix and dispersal is likely lower, influencing the observation that disproportionate effects  
645 and heterogeneity influence the ISAR. Nevertheless, these are just a few case studies we  
646 analyzed where appropriate data were available. A more complete exploration of the generality  
647 of the patterns and potential mechanisms leading to the ISAR will require more thorough  
648 analyses of natural islands and patchy landscapes, as well as habitat islands that are created by  
649 habitat loss and fragmentation. Such analyses will allow us to achieve a more general synthesis  
650 of the patterns and possible processes creating ISARs in natural and fragmented island  
651 landscapes, but will also require more data (i.e., spatially explicit data of total and relative  
652 abundances of species as well as spatially explicit environmental data) than is typically analyzed  
653 in such studies.

654 There are clearly some extensions that can be made to the simple approach that we have  
655 overviewed. For example, when measuring ISARs in the real world, there are often many other  
656 mechanisms that can influence diversity patterns in addition to island size. For example, another  
657 important variable that influences diversity on islands is the isolation (distance) of those islands  
658 from others (e.g., MacArthur and Wilson's 1967, Kreft et al. 2008). Habitat area can also  
659 influence trophic structure (e.g., larger islands may be more likely to have top predators), which  
660 in turn will feedback to influence the shapes of the rarefaction curves and patterns of diversity  
661 (e.g., Östman et al. 2007, Gravel et al. 2011). Likewise, in volcanic archipelagos, larger islands  
662 tend also to be younger and may have not had as much time for diversification as smaller/older  
663 islands, and this confounding factor can also greatly influence the shape of the ISAR (e.g.,  
664 Whittaker et al. 2008, Gillespie and Baldwin 2010). In addition, islands can vary in a number of  
665 other environmental and biological features, all of which can interact with island area.  
666 Fortunately, the metrics for which we have advocated which explicitly incorporate sampling  
667 theory and scale (see also Chase et al. 2018) can be analyzed in more complex models than the  
668 simple regressions that we have presented above. For example, hierarchical models can be

669 applied to each of these metrics, analyzing the influence of island area along with a number of  
670 potential independent variables (see e.g., Blowes et al. 2017 for such analyses addressing a  
671 different set of questions). Likewise, structural equation models comparing patterns of ISARs  
672 along with several other covariables (e.g., Stiles and Scheiner 2010) can be applied to these  
673 metrics to disentangle area effects from other potential drivers.

674 Finally, despite its advantages, it is important to note that our approach is purely observational.  
675 As such, although it can provide deeper insights into the likely mechanisms that influence the  
676 ISAR than previous observational approaches, it cannot definitively discern process from these  
677 patterns. To more definitively test the primary ISAR mechanisms described here, we would  
678 need to go a step or two further. This could include, for example, observational studies that take  
679 advantage of variation, such as islands that varied semi-orthogonally in both area and  
680 heterogeneity (Nilsson et al. 1988, Ricklefs and Lovette 1999, Kallimanis et al. 2008, Hannus  
681 and Von Numers 2008, Stiles and Scheiner 2010), but also disentangling patterns of species  
682 richness in a more scale-explicit way as we have outlined here. Or it could include manipulative  
683 experiments that directly alter island size and/or heterogeneity (e.g., Simberloff 1976, Douglas  
684 and Lake 1994, Matias et al. 2010), or disrupt the processes occurring within islands (e.g.,  
685 altering patterns of within-island dispersal and/or extinction).

#### 686 **Acknowledgements:**

687 This work emerged from discussions among the co-authors in many contexts over many years,  
688 and was also improved by discussions with many other colleagues, including S. Blowes, T.  
689 Engel, P. Keil, S. Kroiss, D. McGlenn, B. McGill and N. Gotelli. Comments from R. Field, J.  
690 Hortal, S. Scheiner and an anonymous reviewer greatly helped us to improve the presentation.  
691 JMC, TMK, DC, LG, and FM were supported by the German Centre of Integrative Biodiversity  
692 Research (iDiv) Halle-Jena-Leipzig (funded by the German Research Foundation; FZT 118).  
693 The contribution of TMK and DC were also supported by the Helmholtz Association and by the  
694 Alexander von Humboldt Foundation. Ideas presented in this manuscript were inspired from  
695 work done as part of a grant supported by the U.S. National Science Foundation (DEB 0949984)  
696 to JMC and TMK.

#### 697 **Author Contributions:**

698 JMC and TMK developed the initial conceptualization of the framework presented here, with  
699 significant input from WAR, MAS, FM, DC and LG at different stages. WAR provided the data  
700 for the grasshopper case study; FM provided the data for the fragmentation case study. LG wrote  
701 the code, with help from DC and FM, and did the analyses. JMC wrote the first draft of the  
702 manuscript, and all authors contributed significantly to revisions.

#### 703 **Data and Code Accessibility:**

704 The code to run the analyses described here, as well as the data for the case studies, are freely  
705 available on [https://github.com/Leana-Gooriah/ISAR\\_analysis](https://github.com/Leana-Gooriah/ISAR_analysis).

706

707 **Literature Cited:**

- 708 Allouche, O., M. Kalyuzhny, G. Moreno-Rueda, M. Pizarro, & R. Kadmon. (2012). Area-  
709 heterogeneity tradeoff and the diversity of ecological communities. *Proceedings of*  
710 *the National Academy of Sciences USA*, 109, 17495–17500.  
711
- 712 Arrhenius, O. (1921). Species and area. *Journal of Ecology* 9, 95-99.  
713
- 714 Azaele, S., A. Maritan, S. J. Cornell, S. Suweis, J. R. Banavar, D. Gabriel, & W. E. Kunin.  
715 (2015). Towards a unified descriptive theory for spatial ecology: predicting  
716 biodiversity patterns across spatial scales. *Methods in Ecology and Evolution*, 6, 324–  
717 332.  
718
- 719 Blowes, S.A., J. Belmaker & J. M. Chase (2017). Global reef fish richness gradients  
720 emerge from divergent and scale-dependent component changes. *Proceedings.*  
721 *Biological Sciences B.*, 284, 1867.  
722
- 723 Borregaard, M.K. & C. Rahbek (2010). Causality of the relationship between geographic  
724 distribution and species abundance. *Quarterly Review of Biology*, 85, 3-25.  
725
- 726 Borregaard, M. K., T. J. Matthews, and R. J. Whittaker (2016). The general dynamic  
727 model: towards a unified theory of island biogeography? *Global Ecology and*  
728 *Biogeography*, 25, 805–816.  
729
- 730 Chao, A. (1984). Nonparametric estimation of the number of classes in a population.  
731 *Scandinavian Journal of Statistics*, 11, 265–270.  
732
- 733 Chao, A., & C.-H. Chiu. (2016). Species Richness: Estimation and Comparison. Pages 1–  
734 26 in N. Balakrishnan, T. Colton, B. Everitt, W. Piegorisch, F. Ruggeri, and J. L.  
735 Teugels, editors. *Wiley StatsRef: Statistics Reference Online*. John Wiley & Sons,  
736 Ltd, Chichester, UK.  
737
- 738 Chao, A., & L. Jost. (2012). Coverage-based rarefaction and extrapolation: standardizing  
739 samples by completeness rather than size. *Ecology*, 93, 2533–2547.  
740
- 741 Chase, J. M., & M. A. Leibold. (2003). *Ecological Niches: linking classical and*  
742 *contemporary approaches*. University of Chicago Press, Chicago, Illinois, USA.  
743
- 744 Chase, J., B. McGill, D. J. McGlinn, F. May, S. A. Blowes, X. Xiao, T. M. Knight, O.  
745 Purschke, & N. J. Gotelli. (2018). Embracing scale-dependence to achieve a deeper

- 746 understanding of biodiversity and its change across communities. *Ecology Letters*,  
747 21, 1737-1751.
- 748
- 749 Chisholm, R. A., T. Fung, D. Chimalakonda, & J. P. O'Dwyer. (2016). Maintenance of  
750 biodiversity on islands. *Proceedings of the Royal Society B: Biological Sciences*, 283,  
751 20160102.
- 752
- 753 Colwell, R. K., A. Chao, N. J. Gotelli, S.-Y. Lin, C. X. Mao, R. L. Chazdon, & J. T.  
754 Longino. (2012). Models and estimators linking individual-based and sample-based  
755 rarefaction, extrapolation and comparison of assemblages. *Journal of Plant Ecology*,  
756 5, 3–21.
- 757
- 758 Condit, R., Pitman, N., Leigh, E.G., et al., (2002). Beta-diversity in tropical forest trees.  
759 *Science*, 295, pp.666-669.
- 760
- 761 Connor, E. F., & E. D. McCoy. (1979). The statistics and biology of the species-area  
762 relationship. *American Naturalist* 113, 791–833.
- 763
- 764 Davidar, P., K. Yoganand & T. Ganesh (2001). Distribution of forest birds in the Andaman  
765 islands: importance of key habitats. *Journal of Biogeography*, 28, 663-671.
- 766
- 767 Davidar, P., K. Yoganand, T. Ganesh, & S. Devy. (2002). Distributions of forest birds and  
768 butterflies in the Andaman islands, Bay of Bengal: nested patterns and processes.  
769 *Ecography*, 25, 5–16.
- 770
- 771 Diamond, J. M. (1975). The island dilemma: lessons of modern biogeographic studies for  
772 the design of natural reserves. *Biological Conservation*, 7, 129-146.
- 773
- 774 Douglas, M. & P. S. Lake. (1994). Species richness of stream stones: An investigation of  
775 the mechanisms generating the species-area relationship. *Oikos*, 69, 387-396.
- 776
- 777 Drakare, S., J. J. Lennon & H. Hillebrand. (2006). The imprint of the geographical,  
778 evolutionary and ecological context on species-area relationships. *Ecology Letters*, 9,  
779 215–227.
- 780 Ewers, R.M. & R. K. Didham (2006). Confounding factors in the detection of species  
781 responses to habitat fragmentation. *Biological Reviews*, 81, 117-142.
- 782
- 783 Fahrig, L. (2013). Rethinking patch size and isolation effects: the habitat amount  
784 hypothesis. *Journal of Biogeography*, 40, 1649–1663.
- 785



- 786 Fahrig, L. (2017). Ecological responses to habitat fragmentation per se. *Annual Review of*  
787 *Ecology, Evolution, and Systematics* 48, 1–23.
- 788
- 789 Gaston, K.J., T. M. Blackburn, J. L. Greenwood, R. D. Gregory, R. M. Quinn & J. H.  
790 Lawton (2000). Abundance–occupancy relationships. *Journal of Applied Ecology*, 37,  
791 39-59.
- 792
- 793 Giladi, I., F. May, M. Ristow, F. Jeltsch, & Y. Ziv. (2014). Scale-dependent species-area  
794 and species-isolation relationships: a review and a test study from a fragmented semi-  
795 arid agro-ecosystem. *Journal of Biogeography* 41, 1055–1069.
- 796
- 797 Giladi, I., Y. Ziv, F. May, & F. Jeltsch. (2011). Scale-dependent determinants of plant  
798 species richness in a semi-arid fragmented agro-ecosystem: Scale-dependent plant  
799 diversity in an agro-ecosystem. *Journal of Vegetation Science*, 22, 983–996.
- 800
- 801 Gillespie, R. G., & B. G. Baldwin. (2009). Island biogeography of remote archipelagoes:  
802 Interplay between ecological and evolutionary Processes. Page *in* J. B. Losos and R.  
803 E. Ricklefs, editors. *The Theory of Island Biogeography Revisited*. Princeton  
804 University Press, Princeton, New Jersey, USA.
- 805
- 806 Gotelli, N. J., & R. K. Colwell. (2001). Quantifying biodiversity: procedures and pitfalls in  
807 the measurement and comparison of species richness. *Ecology Letters*, 4, 379–391.
- 808
- 809 Gotelli, N. J., & G. R. Graves. (1996). *Null models in ecology*. Smithsonian Institute Press,  
810 Washington, D.C., USA.
- 811
- 812 Gravel, D., F. Massol, E. Canard, D. Mouillot, & N. Mouquet. (2011). Trophic theory of  
813 island biogeography: Trophic theory of island biogeography. *Ecology Letters*, 14,  
814 1010–1016.
- 815
- 816 Haddad, N. M., L. A. Brudvig, J. Clobert, et al. (2015). Habitat fragmentation and its  
817 lasting impact on Earth’s ecosystems. *Science Advances*, 1, e1500052–e1500052.
- 818
- 819 Haddad, N. M., A. Gonzalez, L. A. Brudvig, M. A. Burt, D. J. Levey, & E. I. Damschen.  
820 (2017). Experimental evidence does not support the Habitat Amount Hypothesis.  
821 *Ecography*, 40, 48–55.
- 822
- 823 Hannus, J.-J., & M. Von Numers. (2008). Vascular plant species richness in relation to  
824 habitat diversity and island area in the Finnish Archipelago. *Journal of Biogeography*,  
825 35, 1077–1086.

- 826  
827 Hanski, I. (2015). Habitat fragmentation and species richness. *Journal of Biogeography*, 42,  
828 989–993.  
829
- 830 Hanski, I., & M. Gyllenberg. (1993). Two general metapopulation models and the core-  
831 satellite species hypothesis. *American Naturalist*, 142, 17–41.  
832
- 833 Hanski, I., G. A. Zurita, M. I. Bellocq, & J. Rybicki. (2013). Species-fragmented area  
834 relationship. *Proceedings of the National Academy of Sciences* 110, 12715–12720.  
835
- 836 Harte, J., A. B. Smith, & D. Storch. (2009). Biodiversity scales from plots to biomes with a  
837 universal species-area curve. *Ecology Letters* 12, 789–797.  
838
- 839 Hill, J. L., P. J. Curran, & G. M. Foody. (1994). The effect of sampling on the species-area  
840 curve. *Global Ecology and Biogeography Letters*, 4, 97-106.  
841
- 842 Hill, M. O. (1973). Diversity and evenness: A unifying notation and its consequences.  
843 *Ecology*, 54, 427–432.  
844
- 845 Hortal, J., K. A. Triantis, S. Meiri, E. Thébault, & S. Sfenthourakis. (2009). Island species  
846 richness increases with habitat diversity. *American Naturalist*, 174, E205–E217.  
847
- 848 Hurlbert, S. H. (1971). The nonconcept of species diversity: A critique and alternative  
849 parameters. *Ecology*, 52, 577–586.  
850
- 851 Hsieh, T. C., K. H. Ma & A. Chao. (2018). iNEXT: iNterpolation and EXTrapolation for  
852 species diversity. R package version 2.0.15.  
853
- 854 Jost, L. (2006). Entropy and diversity. *Oikos*, 113, 363–375.  
855
- 856 Kadmon, R., & O. Allouche. (2007). Integrating the effects of area, isolation, and habitat  
857 heterogeneity on species diversity: A unification of island biogeography and niche  
858 theory. *American Naturalis*, 170, 443–454.  
859
- 860 Kallimanis, A. S., A. D. Mazaris, J. Tzanopoulos, J. M. Halley, J. D. Pantis, & S. P.  
861 Sgardelis. (2008). How does habitat diversity affect the species–area relationship?  
862 *Global Ecology and Biogeography*, 17, 532–538.  
863
- 864 Karger, D. N., P. Weigelt, V. B. Amoroso, D. Darnaedi, A. Hidayat, H. Kreft, & M.  
865 Kessler. (2014). Island biogeography from regional to local scales: evidence for a

- 866                   spatially scaled echo pattern of fern diversity in the Southeast Asian archipelago.  
867                   *Journal of Biogeography*, 41, 250–260.
- 868
- 869                   Kohn, D. D., & D. M. Walsh. (1994). Plant species richness: The effect of island size and  
870                   habitat diversity. *Journal of Ecology*, 82, 367–377.
- 871
- 872                   Kreft, H., W. Jetz, J. Mutke, G. Kier, & W. Barthlott. (2008). Global diversity of island  
873                   floras from a macroecological perspective. *Ecology Letters*, 11, 116–127.
- 874
- 875                   Lawton, J. H. (1999). Are there general laws in ecology? *Oikos*, 84, 177–192.
- 876
- 877                   Leibold, M. A., & J. M. Chase. (2017). *Metacommunity ecology*. Princeton University  
878                   Press, Princeton, New Jersey, USA.
- 879
- 880                   Lomolino, M. V. (2000). Ecology's most general, yet protean pattern: the species-area  
881                   relationship. *Journal of Biogeography*, 27, 17–26.
- 882
- 883                   MacArthur, R. H., & E. O. Wilson. (1963). An equilibrium theory of insular zoogeography.  
884                   *Evolution*, 17, 373–387.
- 885
- 886                   MacArthur, R. H., & E. O. Wilson. (1967). *The theory of island biogeography*. Princeton  
887                   University Press, Princeton, New Jersey, USA.
- 888
- 889                   Matias, M. G., A. J. Underwood, D. F. Hochuli, & R. A. Coleman. (2010). Independent  
890                   effects of patch size and structural complexity on diversity of benthic  
891                   macroinvertebrates. *Ecology*, 91, 1908–1915.
- 892
- 893                   Matthews, T. J., F. Guilhaumon, K. A. Triantis, M. K. Borregaard, & R. J. Whittaker.  
894                   (2016). On the form of species-area relationships in habitat islands and true islands:  
895                   Species-area relationships in islands and habitat islands. *Global Ecology and*  
896                   *Biogeography*, 25, 847–858.
- 897
- 898                   Matthews, T. J., M. J. Steinbauer, E. Tzirkalli, K. A. Triantis, & R. J. Whittaker. (2014).  
899                   Thresholds and the species-area relationship: a synthetic analysis of habitat island  
900                   datasets. *Journal of Biogeography*, 41, 1018–1028.
- 901
- 902                   May, R. M. (1975). Patterns of species abundance and diversity. Pages 81–120 *in* M. L.  
903                   Cody and J. M. Diamond, editors. *Ecology and Evolution of Communities*. Belknap  
904                   Press of Harvard University, Cambridge, Massachusetts, USA.
- 905

- 906 McGill, B. J., R. S. Etienne, J. S. Gray, et al. (2007). Species abundance distributions:  
907 moving beyond single prediction theories to integration within an ecological  
908 framework. *Ecology Letters*, 10, 995–1015.  
909
- 910 McGuinness, K.A., 1984. Species–area curves. *Biological Reviews*, 59(3), 423-440.  
911
- 912 McGlinn, D. J., X. Xiao, F. May, N. J. Gotelli, S. Blowes, T. Knight, O. Purschke, J.  
913 Chase, & B. McGill. (2018). Measurement of Biodiversity (MoB): a method to  
914 separate the scale-dependent effects of species abundance distribution, density, and  
915 aggregation on diversity change. *Methods in Ecology and Evolution*  
916 <https://doi.org/10.1111/2041-210X.13102>.  
917
- 918 Nilsson, S. G., J. Bengtsson, & S. As. (1988). Habitat diversity or area per se? Species  
919 richness of woody plants, carabid beetles and land snails on islands. *Journal of*  
920 *Animal Ecology*, 57, 685-704.  
921
- 922 Oksanen et al. (2018). *vegan: Community Ecology Package*. R package version 2.4-5.  
923
- 924 Olszewski, T. D. (2004). A unified mathematical framework for the measurement of  
925 richness and evenness within and among multiple communities. *Oikos*, 104, 377–387.  
926
- 927 Orrock, J. L., & J. I. Watling. (2010). Local community size mediates ecological drift and  
928 competition in metacommunities. *Proceedings of the Royal Society B: Biological*  
929 *Sciences* 277, 2185–2191.  
930
- 931 Östman, Ö., N. W. Griffin, J. L. Strasburg, J. A. Brisson, A. R. Templeton, T. M. Knight,  
932 & J. M. Chase. (2007). Habitat area affects arthropod communities directly and  
933 indirectly through top predators. *Ecography*, 30, 359–366.  
934
- 935 Ovaskainen, O., G. Tikhonov, A. Norberg, F. G. Blanchet, L. Duan, D. Dunson, T. Roslin,  
936 & N. Abrego, (2017). How to make more out of community data? A conceptual  
937 framework and its implementation as models and software. *Ecology Letters*, 20, 561-  
938 576.  
939
- 940 Peres-Neto, P.R., P. Legendre, S. Dray, & D. Borcard (2006). Variation partitioning of  
941 species data matrices: estimation and comparison of fractions. *Ecology*, 87, 2614-  
942 2625.  
943
- 944 Preston, F. W. (1960). Time and space and the variation of species. *Ecology*, 41, 611–627.  
945

- 946 R Core Team. (2018). R: A language and environment for statistical computing. R  
947 Foundation for Statistical Computing, Vienna, Austria.  
948
- 949 Ricklefs, R. E., & I. J. Lovette. (1999). The roles of island area per se and habitat diversity  
950 in the species-area relationships of four Lesser Antillean faunal groups. *Journal of*  
951 *Animal Ecology*, 68, 1142–1160.  
952
- 953 Ryberg, W. A., & J. M. Chase. (2007). Predator-dependent species-area relationships.  
954 *American Naturalist* 170, 636–642.  
955
- 956 Ryberg, W.A., (2009). Predation, community assembly, and the scaling of prey diversity in  
957 Ozark glade metacommunities. PhD Dissertation, Washington University in St.  
958 Louis.  
959
- 960 Scheiner, S.M., (2003). Six types of species-area curves. *Global Ecology and*  
961 *Biogeography*, 12, 441-447.  
962
- 963 Scheiner, S.M., A. Chiarucci, G. A. Fox, M. R. Helmus, D. J. McGlenn, D.J. & M. R.  
964 Willig (2011). The underpinnings of the relationship of species richness with space  
965 and time. *Ecological Monographs*, 81, 195-213.  
966
- 967 Sfenthourakis, S. & M. Panitsa. (2012). From plots to islands: species diversity at different  
968 scales: Diversity patterns in insular plants communities. *Journal of Biogeography*, 39,  
969 750–759.  
970
- 971 Simberloff, D. S. and L. G. Abele (1976). Island biogeography theory and conservation  
972 practice. *Science*, 191, 285-286.  
973
- 974 Simberloff, D. (1976). Experimental zoogeography of islands: Effects of island size.  
975 *Ecology*, 57, 629–648.  
976
- 977 Smith, V. H., B. L. Foster, J. P. Grover, R. D. Holt, M. A. Leibold, & F. deNoyelles.  
978 (2005). Phytoplankton species richness scales consistently from laboratory  
979 microcosms to the world’s oceans. *Proceedings of the National Academy of Sciences*  
980 *USA*, 102, 4393–4396  
981
- 982 Stiles, A. and Scheiner, S.M., (2010). A multi-scale analysis of fragmentation effects on  
983 remnant plant species richness in Phoenix, Arizona. *Journal of Biogeography*, 37,  
984 1721-1729.  
985

- 986 Surendran, H. & K. Vasudevan. (2015a). The devil is in the detail: estimating species  
987 richness, density, and relative abundance of tropical island herpetofauna. *BMC*  
988 *Ecology*, 15, 18.  
989
- 990 Surendran, H. & K. Vasudevan. (2015b). Data from: The devil is in the detail: estimating  
991 species richness, density, and relative abundance of tropical island herpetofauna.  
992 Dryad Digital Repository. <https://doi.org/10.5061/dryad.88v79>  
993
- 994 Tilman, D. (1982). Resource competition and community structure. Princeton University  
995 Press, Princeton, NJ.  
996
- 997 Tjørve, E. (2009). Shapes and functions of species-area curves (II): a review of new models  
998 and parameterizations. *Journal of Biogeography* 36, 1435–1445.  
999
- 1000 Tuomisto, H. (2010). A diversity of beta diversities: straightening up a concept gone awry.  
1001 Part 1. Defining beta diversity as a function of alpha and gamma diversity.  
1002 *Ecography*, 33, 2-22.  
1003
- 1004 Triantis, K. A., F. Guilhaumon, & R. J. Whittaker. (2012). The island species-area  
1005 relationship: biology and statistics. *Journal of Biogeography*, 39, 215–231.  
1006
- 1007 Whittaker, R. H. (1972). *Communities and ecosystems*. Macmillan, New York, New York,  
1008 USA.  
1009
- 1010 Whittaker, R. J., K. A. Triantis, and R. J. Ladle. (2008). A general dynamic theory of  
1011 oceanic island biogeography. *Journal of Biogeography*, 35, 977-994.  
1012
- 1013 Ware, S. (2002). Rock outcrop plant communities (Glades) in the Ozarks: A synthesis.  
1014 *Southwestern Naturalist* 47, 585-597.  
1015
- 1016 Williams, C. B., (1964). *Patterns in the balance of nature and related problems of*  
1017 *quantitative ecology*. Academic Press, London, UK.  
1018
- 1019 Yaacobi, G., Y. Ziv, & M. L. Rosenzweig. (2007). Habitat fragmentation may not matter to  
1020 species diversity. *Proceedings of the Royal Society B: Biological Sciences*, 274,  
1021 2409–2412.  
1022
- 1023 Wickham, H., 2016. *ggplot2: Elegant Graphics for Data Analysis*. Springer-Verlag, New  
1024 York, USA.  
1025
